1 **Crop diversity enhances disease suppressive potential in soils**

2

3

4 Ariane L. Peralta,<sup>a\*</sup> Yanmei Sun,<sup>a\*</sup> Marshall D. McDaniel,<sup>b</sup> and Jay T. Lennon<sup>c</sup>

5

6 Department of Biology, East Carolina University, Greenville, NC, USA<sup>a</sup>; Department of

7 Agronomy, Iowa State University, USA<sup>b</sup>; Department of Biology, Indiana University,

8 Bloomington, IN, USA<sup>c</sup>

9 \*A.L.P and Y.S. contributed equally to this work.

10

11 E-mail: peraltaa@ecu.edu; sunya14@ecu.edu; marsh@iastate.edu, lennonj@indiana.edu

12

13 Running Head: Crop diversity enhances disease suppression

14

15 Corresponding author: Ariane L. Peralta, e-mail: peraltaa@ecu.edu

16

17

18

19

20

21

22

23

24 **ABSTRACT**

25 Biodiversity is thought to regulate a wide range of agroecosystem processes including plant  
26 production and disease suppression. Farmers have used crop rotations, a form of biodiversity, for  
27 thousands of years and this may be due, in part, to early observations of “disease prevention” in  
28 the form of increased yield. However, the evidence for a mechanistic link between crop  
29 rotations and disease suppression has not yet been elucidated. Disease suppressive soils are  
30 characterized by the biocontrol properties provided by resident soil microorganisms. Biocontrol  
31 properties include antibiosis via production of antifungal or antibacterial compounds known to  
32 suppress the growth of soil-borne pathogens. In this study, we investigated the impact of long-  
33 term crop diversity (via rotation) on microbial communities and disease suppressive functional  
34 potential in soils. We hypothesized that plant and microbial biodiversity provide disease  
35 suppressive functions in soils. To address these hypotheses, we collected soil samples from a 12-  
36 year crop rotation experiment at the Kellogg Biological Station Long-Term Ecological Research  
37 (KBS LTER) site. We sampled seven treatments along a crop diversity gradient (monoculture to  
38 five crop species) and a spring fallow (naturally regenerating plants) treatment to examine the  
39 influence of crop diversity on total bacterial community composition (16S rRNA gene  
40 sequencing) and a subset of microorganisms capable of producing antifungal compounds (2,4-  
41 diacetylphloroglucinol: *phlD* gene fingerprint analysis; pyrrolnitrin: *prnD* gene quantitative  
42 PCR). Our study revealed that crop diversity significantly influenced bacterial community  
43 composition, and crop rotations decreased bacterial diversity by 4% on average compared to  
44 monocultures. Crop rotations did, however, increase disease suppressive functional group *prnD*  
45 gene abundance in the more diverse rotation (corn-soybean-wheat + cover crops) by about 9%  
46 compared to monocultures. Variation in plant inputs to soil organic matter pools may be a

47 possible mechanism driving shifts in microbial community patterns and disease suppressive  
48 functional potential.

49

50 Keywords

51 Crop rotation; disease suppression; microbial diversity; structure-function relationships

52

53 Abbreviations

54 2,4-diacetylphloroglucinol (DAPG); plant growth promoting rhizobacteria (PGPR); plant  
55 pathogen suppression (PPS); pyrrolnitrin (PRN)

56

57

58

59

60

61

62

63

64

65

66

67

68

69

## 70 **1. Introduction**

71           Agricultural intensification has led to declines in biodiversity and in associated  
72 ecosystem functions (Tilman et al., 2002). However, crop diversification within agricultural  
73 landscapes is a strategy used to alleviate this loss in biodiversity. Increases in crop biodiversity  
74 on the farm can take many forms, such as crop rotations, cover crops, inter-cropping, and cover  
75 crop mixtures. From a management or conservation perspective, crop rotations are not the  
76 traditional form of increasing biodiversity. Instead of managing species in space, crop rotations  
77 increase diversity through time. This is because at any given time the species richness on a farm  
78 using crop rotations is often one (same as monocultures), but there is a diverse suite of  
79 biochemical inputs from crops planted at different times to soil microorganisms. There is  
80 mounting evidence that this form of ‘temporal biodiversity’ may provide some of the same  
81 beneficial ecosystem functions as traditional spatial biodiversity, such as carbon sequestration,  
82 pest control, and nutrient cycling (Ball et al., 2005; McDaniel et al., 2014b; Tiemann et al., 2015;  
83 Venter et al., 2016).

84           Different mechanisms confer plant pathogen suppression (PPS) in the soil. First, crops  
85 and the soil microbial community are linked by the plant inputs of carbon and nutrients to the  
86 soil. Studies have shown the quantity and quality, and likely even the diversity of crop inputs  
87 (residues and rhizodeposits) to soil can alter the microbial community and functioning (Zak et  
88 al., 2003; Hättenschwiler et al., 2005; Dijkstra et al., 2010; van der Putten et al., 2016). Second,  
89 each crop will affect the physical characteristics of the soil environment whether it is with  
90 differences in water use (Tilman et al., 2002), shading (Liebman and Dyck, 1993), aggregation  
91 (Tiemann et al., 2015), root morphology affecting porosity (Smucker, 1993), or all of the above.  
92 Both of these chemical and physical mechanisms of crop influence on soil microbial

93 communities might alter the functions important to crops, such as nutrient mineralization from  
94 soil organic matter (Barness et al., 1991), N<sub>2</sub> fixation (Reed et al., 2010), plant growth promotion  
95 (Lugtenberg and Kamilova, 2009), and plant pathogen suppression (Bever et al., 1997; Haas and  
96 Defago, 2005; Perez et al., 2008). The stimulation of these functions is what likely controls  
97 plant-soil feedbacks in agroecosystems (Bever et al., 1997; Kulmatiski et al., 2008; van der  
98 Putten et al., 2016).

99         Greater plant pathogen suppression has been associated with soil microbial communities  
100 known to exhibit antimicrobial properties, which ultimately provide plants with protection from  
101 soil-borne plant pathogens. Greater soil microbial diversity can provide more opportunity for  
102 PPS potential microorganisms to be maintained although may not be required. Maintenance of  
103 these PPS microorganisms in the community are thought to occur due to competition for iron,  
104 antibiosis, lytic enzymes, and induction of system resistance with host plant (Doornbos et al.,  
105 2012). Specifically, antibiosis has been linked to disease suppressive capacity, whereby the  
106 abundance of antagonistic bacteria has been associated reductions in fungal pathogens through  
107 competitive inhibition (Weller et al., 2002; Haas and Defago, 2005). Bacterial production of  
108 secondary metabolites 2,4-diacetylphloroglucinol (DAPG) and pyrrolnitrin (PRN) are two potent  
109 toxins known to suppress fungal pathogens in agricultural soils (Garbeva et al., 2004a; Garbeva  
110 et al., 2004b; Haas and Defago, 2005). In a previous study, increased plant diversity was  
111 associated with enhanced soil disease suppressiveness measured by increased DAPG and PRN  
112 producers (Latz et al., 2012). In other studies, streptomycetes (a well-known group of bacteria  
113 possessing antibiotic inhibitory effects) were found to contribute to disease suppression in  
114 agricultural soils (Wiggins and Kinkel, 2005; Perez et al., 2008). However, the diversity,  
115 composition, and disease suppressive activity among streptomycetes communities has also been

116 found to be unrelated to plant diversity treatments (Bakker et al., 2010). Thus, the relationship  
117 between biodiversity and disease suppression in agricultural soils remains unclear. By focusing  
118 on the disease suppressive capacity of soil, we can evaluate how agricultural land-use strategies  
119 and subsequent changes in the soil environment and resident microorganisms impact plant  
120 growth (Bakker et al., 2010; Kulmatiski and Beard, 2011).

121         Given the unknown effect of crop diversity, via rotations on microbial communities and  
122 plant pathogen suppression, we used a long-term (12 y) crop rotation study at the Kellogg  
123 Biological Station LTER to test the effect of crop diversity on soil bacterial biodiversity and PPS  
124 potential. Specifically, our research addresses the following questions: (1) what is the  
125 relationship between crop diversity and soil microbial community composition and disease  
126 suppressive functional potential? and (2) what is the relationship between changes in soil  
127 physicochemical properties, soil microbial community composition, and disease suppressive  
128 functional potential in response to a crop diversity gradient? We tested the hypothesis that plant  
129 and microbial biodiversity provide disease suppressive functions in soils. We predicted that soils  
130 from high crop diversity (i.e., long crop rotations) would have greater soil bacterial diversity and  
131 have greater PPS capacity compared to soil microbial communities developed under low crop  
132 diversity (i.e., monoculture and short crop rotations like corn-soybean).

133

## 134 **2. Methods**

135

### 136 *2.1. Site description & experimental design*

137

138         We collected soils from the Biodiversity Gradient Experiment

139 (<http://lter.kbs.msu.edu/research/long-term-experiments/biodiversity-gradient/>) at W.K. Kellogg  
140 Biological Station Long-Term Ecological Research (KBS LTER) site in southwest, Michigan,  
141 USA. Mean annual temperature is 9.7 °C and mean annual precipitation is 890 mm. The soils are  
142 Kalamazoo (fine-loamy) and Oshtemo (coarse-loamy) mixed, mesic, Typic Hapludalfs formed  
143 under glacial outwash (Crum and Collins, 1995). The crop rotation treatments at the Biodiversity  
144 Gradient Experiment included: monoculture corn (*Zea mays*, mC), corn with 1 red clover  
145 (*Trifolium pretense* L.) cover crop (C<sub>1cov</sub>), corn-soy (*Glycine max*, CS), corn-soy-wheat (*Triticum*  
146 *aestivum*, CSW), CSW with red clover (CSW<sub>1cov</sub>), CSW with red clover and cereal rye (*Secale*  
147 *cereal* L., CSW<sub>2cov</sub>), and a spring fallow treatment that was just plowed every spring but contains  
148 7-10 naturally-occurring plant species in the region (Table 1). This spring fallow treatment is  
149 considered the benchmark for plant diversity in the region, and under same tillage. Plantings of  
150 cover crop were dependent on the main crop in rotation (Smith and Gross, 2006). The  
151 experiment was in a randomized complete block design, which included four blocks or replicates  
152 of each treatment. All plots received the same tillage at 15 cm depth, and no fertilizer or  
153 pesticides were applied to these plots.

154

## 155 2.2. Soil sampling

156

157 We sampled soil from six crop diversity treatments, but to eliminate any immediate crop  
158 effect all the treatments were sampled in the corn phase and a spring fallow treatment (Table 1)  
159 on November 1, 2012. In each plot, we collected five soil cores (5 cm diameter, 10 cm depth)  
160 and then homogenized the cores in the field. A subsample from each composite sample was  
161 sieved through 4 mm in the field, flash frozen in the field in liquid nitrogen, and stored at -80 °C

162 prior to molecular-based microbial analyses. On the remaining sample, soil chemical properties  
163 (total carbon, total nitrogen, ammonium, nitrate, pH, texture) were analyzed as originally  
164 reported elsewhere (McDaniel et al., 2014a; McDaniel et al., *In press*). Labile C was measured as  
165 permanganate oxidizable C (POXC). Overall biological activity and amount of potentially  
166 mineralizable carbon (PMC) and nitrogen (PMN) were analyzed using the aerobic incubation  
167 method (McDaniel et al., *In press*).

168

### 169 2.3. Bacterial community sequencing

170

171 We extracted DNA using the MoBio Power Soil DNA Isolation Kit (MO BIO  
172 Laboratories, Inc., Carlsbad, CA). DNA concentration was adjusted to a standard concentration  
173 of 20 ng  $\mu\text{l}^{-1}$  and used as template. To characterize bacterial taxonomic diversity, we used  
174 barcoded primers (515f/806r primer set) developed by the Earth Microbiome Project to target the  
175 V4-V5 region of the bacterial 16S subunit of the ribosomal RNA gene (16S rRNA) (Caporaso et  
176 al., 2012). For each sample, PCR product combined from three 50  $\mu\text{l}$  reactions, concentration  
177 quantified, and PCR product from each soil sample was combined in equimolar concentrations  
178 for paired-end 250 $\times$ 250 sequencing using the Illumina MiSeq platform according to details in  
179 Muscarella et al. (2014). Briefly, we assembled the paired-end 16S rRNA sequence reads using  
180 the Needleman algorithm (Needleman and Wunsch, 1970). All sequences were subjected to  
181 systematic checks to reduce sequencing and PCR errors. High quality sequences (i.e., >200 bp in  
182 length, quality score of >25, exact match to barcode and primer, and contained no ambiguous  
183 characters) were retained. In addition, we identified and removed chimeric sequence using the  
184 UCHIME algorithm (Edgar et al., 2011). We aligned our sequence data set with the bacterial



185 SILVA-based bacterial reference database (Yilmaz et al., 2013). During data analysis,  
186 operational taxonomic units (OTUs) were binned at 97% sequence identity and phylogenetic  
187 classifications of bacterial sequences performed. Sequences were processed using the software  
188 package *mothur* v.1.35.1 (Schloss et al., 2009; Kozich et al., 2013).

189

#### 190 2.4. Composition and abundance of disease suppression genes

191

192 We classified disease suppressive taxa as the subset of soil microorganisms possessing  
193 genes that are required for the production of antifungal compounds 2,4-diacetylphloroglucinol  
194 (DAPG) and pyrrolnitrin (PRN) (Garbeva et al., 2004b; Haas and Defago, 2005). We targeted  
195 *phlD* and *prnD*, which are known to code for a subset of DAPG producers and PRN producers,  
196 respectively in environmental samples (according to methods in Latz et al. 2012). We assessed  
197 the composition of disease suppressive microorganisms by targeting the *phlD* gene using  
198 terminal restriction fragment length polymorphism (T-RFLP) (von Felten et al., 2011). For *phlD*  
199 gene amplification, the forward primer B2BF (5'-ACCCACCGCAGCATCGTTTATGAGC-3')  
200 and reverse primer FAM-BPR4 (5'-CCGCCGGTATGGAAGATGAAAAAGTC-3') yielded a  
201 629 bp product. In each 25  $\mu$ L PCR reaction, we combined 5% dimethylsulfoxide, 0.8 mg ml<sup>-1</sup>  
202 bovine serum albumin, 1 $\times$  GoTaq Colorless Master Mix (Promega, Madison, WI), 0.2  $\mu$ M of  
203 each primer and 5  $\mu$ L of template DNA. Reactions were cycled with an initial denaturation at 94  
204  $^{\circ}$ C for 2 min, followed by 35 cycles of 94  $^{\circ}$ C for 1 min, 60  $^{\circ}$ C for 1 min, and 72  $^{\circ}$ C for 2 min,  
205 with a final extension carried out at 72  $^{\circ}$ C for 10 min (von Felten et al., 2011). The amplified  
206 PCR products were purified with QIAquick PCR purification kit (Qiagen, Valencia, CA). After  
207 purification, amplicons generated from each sample were digested in multiple restriction

208 enzymes overnight in 12  $\mu$ L reaction mixtures containing 4  $\mu$ L of PCR product, 1 $\times$ enzyme buffer  
209 (von Felten et al., 2011). After digestion, the enzymes were inactivated for 5 min at 80  $^{\circ}$ C, and  
210 the digested products were purified according to the purification kit protocol (Qiagen, Valencia,  
211 CA). For T-RFLP analysis, we combined 1.5  $\mu$ L of the digested product with 9  $\mu$ L of HiDi  
212 formamide (Applied Biosystems, Foster City, CA) and 0.4  $\mu$ L of internal size standard ABI  
213 GeneScan LIZ 600 (Applied Biosystems, Foster City, CA). The samples were incubated for 3  
214 min at 96  $^{\circ}$ C and then stored on ice prior to fragment analysis. We determined the length and  
215 relative abundance of terminal restriction fragments (T-RFs) using an ABI 3130 $\times$ 1 Genetic  
216 Analyzer (Applied Biosystems, Foster City, CA). Electrophoresis conditions were 60  $^{\circ}$ C and 15  
217 kV with a run time of 41 min using POP-7 polymer. The resulting data was analyzed using  
218 GeneMapper Software 4.0 (Applied Biosystems, Foster City, CA). The peak detection limit was  
219 set to 50 fluorescence intensity units.

220 We assessed the relative abundance of disease suppressive functional genes by targeting  
221 *prnD* using quantitative PCR (qPCR) (Garbeva et al., 2004b). The partial *prnD* gene abundance  
222 was quantified using a SYBR green assay with primers *prnD*-F (5'-  
223 TGCCTTCGCGTTCGAGAC-3') and *prnD*-R (5'-GTTGCGCGTCGTAGAAGTTCT-3')  
224 (Garbeva et al., 2004b). The 25  $\mu$ L PCR reaction contained 1 $\times$  GoTaq Colorless Master Mix  
225 (Promega, Madison, WI), 0.4  $\mu$ M of each primer, and 5  $\mu$ L of template DNA. Cycling conditions  
226 were as following: initial cycle 95  $^{\circ}$ C for 10 min, and 30 cycles of 95  $^{\circ}$ C for 15 s and 60  $^{\circ}$ C for 1  
227 min. For the qPCR standard curve, *prnD* gene was amplified from soil genomic DNA. PCR  
228 fragments were cloned to pGEM-T Easy Vector System according to the manufacturer's manual  
229 (Promega, Madison, WI). Plasmids were extracted using the QIAprep Spin Miniprep kit (Qiagen,  
230 Valencia, CA), and cloned fragments were verified by PCR and agarose gel electrophoresis.

231 Dilutions of plasmid DNA containing *prnD* gene were used to generate standard curves in  
232 quantities ranging from  $5.0 \times 10^2$  to  $5.0 \times 10^7$  copies. We quantified the *prnD* gene in 25  $\mu$ L  
233 reaction volumes containing about 20 ng DNA template, 1 $\times$ TaqMan Environmental Master Mix  
234 2.0 (Applied Biosystems, Valencia, CA), 1 $\times$  SYBR green I, and 0.4  $\mu$ M of each primer.  
235 Fragments were amplified with an initial denaturation step at 95 °C for 10 min, followed by 40  
236 cycles of 95°C for 15 s, 60 °C for 1 min. For each sample, PCR reactions were run in triplicate.  
237 We obtained standard curves based on serial dilutions of mixed PCR product amplified from soil  
238 samples. Reactions were analyzed on a BIO-RAD CFX-96Real-Time System (Bio-Rad,  
239 Hercules, California, USA).

240

## 241 2.5. Statistical analyses

242

243 We tested for differences in total bacterial diversity (based on Shannon Diversity index  
244  $H'$ ) and *prnD* gene abundance in response to crop diversity treatment using analysis of variance  
245 (ANOVA). We checked that data met assumptions of analyses, and we treated crop diversity  
246 treatment as a fixed factor and block as a random effect. We used Tukey's Honestly Significant  
247 Difference (HSD) tests to identify between-group differences in bacterial diversity and *prnD*  
248 gene abundance.

249 To visualize patterns of microbial community composition, we used Principal  
250 Coordinates Analysis (PCoA) of the microbial community composition based on the Bray-Curtis  
251 dissimilarity coefficient for each possible pair of samples using the R statistical package (R Core  
252 Development Team 2015). To test for differences in total bacterial communities and a subset of  
253 previously identified biocontrol bacterial taxa (i.e., *Pseudomonas* spp. and *Streptomyces* spp.)

254 among crop diversity treatments, we used non-parametric permutational multivariate analysis of  
255 variance (PERMANOVA) implemented with the *adonis* function in the R Statistics Package R  
256 version 3.0.2 (R Development Core Team 2015). PERMANOVA was also used to assess the  
257 contribution of soil factors to the variation in bacterial community composition. The  $R^2$  value  
258 reported refers to the treatment sums of squares divided by the total sums of squares for each soil  
259 factor in the model. Because the *adonis* function carries out sequential tests (similar to Type I  
260 sums of squares) (Oksanen et al., 2010), the effect of the last soil factor or soil biological activity  
261 factor of the model was included in the final PERMANOVA model summary (Peralta et al.,  
262 2012). We also performed a similarity percentage analysis (SIMPER) using the *simper* function  
263 (R Statistics Package R version 3.0.2) (Clarke, 1993; Warton et al., 2012) to identify the bacterial  
264 OTUs responsible for community differences between monoculture corn and other crop diversity  
265 treatments and is based on the contribution of individual taxa to the average Bray-Curtis  
266 dissimilarity. We also performed multiple linear regression (gene abundance ~ crop number +  
267 total soil carbon + soil moisture + soil ammonium + soil nitrate) to test the influence of soil  
268 factors and crop diversity number on abundance of disease suppression/biocontrol gene *prnD*  
269 using the *lm* function in the R Statistics Package R version 3.0.2 (R Core Development Team  
270 2015).

271

### 272 **3. Results**

273

#### 274 *3.1. Bacterial community composition along a crop diversity gradient*

275

276 A total of 12,539,359 sequence reads were generated, and we analyzed 47,261 OTUs for  
277 bacterial community "patterns". A summary of soil attributes is presented in Table S1 and  
278 elsewhere (McDaniel and Grandy, 2016). The crop diversity treatment significantly influenced  
279 bacterial community composition ( $R^2 = 0.37$ ,  $p < 0.001$ ; Table S2a, Fig. 1). Bacterial  
280 communities from the fallow plots and the most diverse crop rotations (CSW, CSW<sub>1cov</sub>,  
281 CSW<sub>2cov</sub>) were more similar to each other than the lower crop diversity treatments (C<sub>1cov</sub>, CS)  
282 (Fig. 1). The monoculture corn (mC) treatment was more distinct in bacterial community  
283 composition than all other crop diversity treatments (Fig. 1). Bacterial diversity, as measured  
284 using Shannon Diversity Index ( $H'$ ), was surprisingly greater under lower crop diversity systems  
285 than higher crop diversity systems, but highest in fallow treatments the most diverse non-  
286 cropping system (crop rotation:  $F_{6,20} = 10.16$ ,  $p < 0.0001$ ; block:  $F_{1,20} = 0.20$ ,  $p = 0.6600$ ; Fig. 2).  
287 Among, the corn cropping systems, mC had the highest Shannon Diversity Index and decreased  
288 by up to as much as 4 % in the most diverse rotation of corn-soybean-wheat with two cover  
289 crops (CSW<sub>2cov</sub>).

290 Bacterial community composition was best explained by soil texture ( $R^2 = 0.066$ ,  $p < 0.05$ ,  
291 Table 3a). However, bacterial community composition was marginally affected by soil moisture  
292 ( $R^2 = 0.048$ ,  $p < 0.10$ , Table 2). Labile C had an effect on bacterial community composition ( $R^2$   
293 = 0.074,  $p < 0.05$ ), but potentially mineralizable C did not. Potentially mineralizable nitrogen  
294 (PMN), however, which is produced in the same aerobic incubation as PMC (a biologically-  
295 available N pool), explained significant variation in bacterial community composition ( $R^2 =$   
296 0.063,  $p < 0.05$ , Table 3).

297 The bacterial taxa primarily responsible for treatment differences between mC and the  
298 other crop diversity treatments are *Sphingomonadales* spp. and *Acidobacteria* subgroup Gp6

299 (Table S3). When we compared a subset of taxa representing broad biocontrol bacterial  
300 community (composed of *Streptomyces* spp. and *Pseudomonas* spp.), there was no significant  
301 pattern in community composition across the crop diversity treatment (PERMANOVA; crop  
302 rotation:  $R^2 = 0.321$ ,  $p = 0.132$ ; Table S4).

303

### 304 3.2. Disease suppression functional potential in soils along a crop diversity

305

306 Crop diversity affected the composition and abundance of disease-suppression soil  
307 microorganisms. We observed a significant shift in the composition of disease-suppression  
308 microorganisms (represented by *phlD* gene T-RFLP) along the crop diversity gradient  
309 (PERMANOVA; crop rotation:  $R^2 = 0.52$ ,  $p = 0.037$ ; Fig. 3, Table S2b). The *phlD* community  
310 composition in the fallow treatment was different from other cropping systems (Fig. 3). The  
311 relative abundance of dominant T-RF 280 bp fragment group, previously identified as an  
312 important disease suppressive bacterial population (von Felten et al., 2011), accounted for about  
313 70% of the disease suppressive community under fallow conditions. In addition, the disease  
314 suppressive functional group T-RF 582 bp was a dominant group, representing about 31-97%  
315 relative abundance across all crop diversity treatments. In addition, *prnD* gene abundances in  
316 cropping systems were higher than under fallow conditions (crop rotation:  $F_{6,20} = 7.51$ ,  $p =$   
317  $0.0003$ ; Fig. 4). In cropping systems, the *prnD* gene in CSW<sub>2cov</sub> treatment was the most  
318 abundant, and the gene abundance was significantly higher than in CSW and fallow treatments  
319 (Fig. 4). Our diversity benchmark, the fallow treatment (i.e., lowest crop diversity), showed the  
320 lowest *prnD* gene abundances (Fig. 4). Based on multiple linear regression analysis, plant and  
321 soil factors significantly influenced *prnD* abundance (Adjusted  $R^2 = 0.40$ ,  $F = 4.571$ ,  $p = 0.005$ ).

322 Crop species number ( $p=0.003$ ), soil carbon ( $p=0.002$ ), and soil moisture ( $p=0.0005$ )  
323 significantly influenced *prnD* gene abundance (Table 4).

324

#### 325 **4. Discussion**

326

327 We found that crop rotation history changed bacterial diversity and disease suppression  
328 potential in agricultural soils in the current study. Contrary to our prediction, bacterial diversity  
329 decreased with increasing cropping diversity (Fig. 2). In contrast, disease suppressive potential  
330 of the soil microbial community increased with crop diversity, with the lowest suppressive  
331 potential in the no crop fallow treatments (Fig. 4). A possible explanation for this pattern in  
332 belowground biodiversity is the contribution of cover crop species to the rotation and the  
333 interaction with weedy plant species associated with these plots and. We observed that without  
334 crop plants (as reflected in the no crop fallow treatment), disease suppressive potential was  
335 significantly diminished compared to crop treatments, possibly due to reduced selection for soil  
336 microorganisms with disease suppression traits. The composition of the soil microbial  
337 community may be more important than diversity to soil suppressive function. Thus, crop  
338 rotation has the potential to impact diseases suppressive function, providing evidence for  
339 sustainable biocontrol of soil-borne pathogens.

340

##### 341 *4.1. Crop diversity decreases belowground (bacterial) diversity*

342

343 Crop rotation history decreased bacterial diversity and increased disease suppression  
344 potential in this 12-year crop diversity study. Contrary to our prediction, however, crop diversity

345 decreased soil bacterial diversity (Fig. 2). A recent meta-analysis showed that the crop rotation  
346 effect increased soil bacterial diversity (i.e., Shannon's diversity index  $H'$ ) most notably in the  
347 first 5 years of treatment, but crop rotations occurring in greater than 5 years were more variable  
348 in diversity (Venter et al., 2016). Although, a few of studies included in the meta-analysis were  
349 based on high throughput sequencing approaches (i.e., pyrosequencing) also found decreases in  
350 bacterial diversity with increasing crop diversity (Alvey et al., 2001; Yin et al., 2010; Reardon et  
351 al., 2014; Venter et al., 2016).

352 The pattern of reduced bacterial diversity (based on 16S rRNA gene sequencing) was  
353 lower in soils with higher cropping diversity did not align with our initial predictions. There are a  
354 number of potential reasons for this pattern. One explanation for this pattern in belowground  
355 biodiversity is the presence of weedy plant species. Increasing crop diversity within a rotation is  
356 used as a strategy for reducing reliance on synthetic herbicides and been correlated with reduced  
357 weed diversity. Early observations at this long-term crop diversity study revealed decreasing  
358 weed abundance with increasing crop diversity during the 2002-2004 seasons (Smith and Gross,  
359 2007). Specifically, the monoculture treatments (including mC) had an average of 13 weed  
360 species per  $m^{-2}$ , but the most diverse cropping systems ( $CSW_{2cov}$ ) had only 5 or 6 in 2003. Thus,  
361 while our crop diversity is lower in monocultures, they actually may have greater total plant  
362 diversity compared to more diverse rotations when weeds are included. Last, instead of diversity,  
363 the Shannon Index might also be looked at as an indicator of a shift in microbial carbon usage.  
364 More specifically, a study by McDaniel and Grandy (McDaniel and Grandy, 2016), using the  
365 very same soils we used in this study, found that catabolic evenness (a diversity measure of the  
366 catabolism of a suite of 31 carbon compounds) also decreased with increasing crop diversity.



367 This indicates that this trend is not just structural, but also functional, and may indicate  
368 specialization.

369

#### 370 4.2. Crop diversity enhances plant pathogen suppression

371

372 The diversity of plant pathogen suppressive (PPS) microbial community increased with  
373 crop diversity treatment (Fig. 4). In addition, we found that the increased crop diversity, via  
374 rotation, increased the abundance and composition of a specific plant pathogen suppression gene.  
375 Together, these results suggest that cropping diversity may increase the disease suppressive  
376 functional potential of agricultural soils. These findings are consistent with previous studies  
377 suggesting that plant diversity can enhance protection against soil-borne pathogens by fostering  
378 antagonistic soil bacterial communities (Latz et al., 2012; van der Putten et al., 2016). One  
379 potential explanation for this effect is changes in plant root exudation, which may lead to  
380 enrichment of plant growth promoting rhizobacteria (PGPRs) (Badri et al., 2009; Chaparro et al.,  
381 2012). In previous studies, interactions among the total microbial community and soil-borne  
382 pathogens in the plant rhizosphere have influenced both plant growth and productivity (Bakker et  
383 al., 2010; Penton et al., 2014).

384 The addition of cover crops to rotations, in particular, strongly increased disease  
385 suppressive potential. This along with evidence from previous studies shows that crop rotations  
386 may prevent many forms of crop disease caused by *Fusarium* spp., *Phytophthora*, and  
387 *Rhizoctonia* spp. (Raaijmakers et al., 2009; van der Putten et al., 2016). Soil microbial diversity  
388 has been implicated as important for soil disease suppression; sterilized soils lose suppressive  
389 capacity, and adding soil microorganisms to sterilized soil facilitates disease suppression  
390 functional capacity (Garbeva et al., 2006; Brussaard et al., 2007; Postma et al., 2008). Biocontrol

391 bacteria can also provide disease suppression against plant pathogens by way of the following  
392 mechanisms: competition for iron, antibiosis, lytic enzymes, induction of system resistance of  
393 host plants (Doornbos et al., 2012). Plants can also recruit specific biocontrol microorganisms in  
394 some cases. A previous study suggests that beneficial pseudomonads are recruited depending on  
395 the most dominant soil-borne pathogen infecting crop species. Specifically, *Pseudomonas* spp.  
396 capable of DAPG production are more effective at controlling *G. faminis* var. *tritici*, while  
397 *Pseudomonas* spp. capable of producing phenazines were enhanced in fields where phenazine-  
398 sensitive *Rhizoctonia* plant pathogen were most dominant (Berendsen et al., 2012; Mavrodi et  
399 al., 2012). In the present study, we analyzed a subset of previously reported biocontrol bacterial  
400 taxa (e.g., *Pseudomonas* spp. and *Streptomyces* spp.) across the crop diversity gradient; however,  
401 we did not detect distinct changes in putative biocontrol community composition (Table S4).

402         The gene abundance results suggest that incorporation of cover crop in rotations increases  
403 *prnD* gene abundance, a gene associated disease suppressive microbial taxa capable of producing  
404 antifungal compound pyrrolnitrin (PRN) (Garbeva et al., 2004b; Haas and Defago, 2005).  
405 Specifically, cover crop species may have important effects on the *prnD* gene abundance and  
406 disease suppressive functional potential in soils. The *prnD* gene abundance in cropping systems  
407 is higher than in fallow treatment. In addition, there are no reports linking the functional group  
408 T-RF 280 to a specific genotype of laboratory strains (von Felten et al., 2011). In our study, this  
409 bacterial group is capable of producing 2,4-diacetylphloroglucinol (DAPG) and affects DAPG  
410 community composition (Fig. 3). The T-RF 582 bp was also reported to be a major DAPG-  
411 producing functional *Pseudomonas kilonensis* in a previous study (von Felten et al., 2011). The  
412 abundance of DAPG and PRN producers increasing with plant diversity has been previously  
413 observed (Latz et al., 2012). Compared to agricultural soils, the PRN producers were more

414 frequently detected in grassland or grassland-derived plots (Garbeva et al., 2004a; Garbeva et al.,  
415 2004b). The *prnD* gene abundance increased in the presence of grasses, but the legume species  
416 tended to decrease the DAPG and PRN producer abundance (Latz et al., 2012). Without crop  
417 plants (as reflected in the fallow treatment), we observed that disease suppressive potential  
418 significantly declined. Disease suppression traits such as antifungal production may not be  
419 needed and are not maintained in the community. When agricultural management is absent, there  
420 is reduced selection for soil microorganisms with disease suppression traits. Together, our  
421 findings combined with previous studies suggest that the land-use regime, plant diversity, and  
422 plant species are involved in structuring disease suppressive microbial communities.

423

#### 424 *4.3 Crop-to-bacterial feedback mechanisms and links to the “rotation effect”*

425

426 Disease suppression may have a major role in what is colloquially referred to as “the  
427 rotation effect.” The increases in yields seen by farmers over the millennia (Karlen et al., 1994)  
428 may be due in large part to disease suppression. Crop rotations may also provide other important  
429 benefits like enhanced nutrient provisioning to plants, improvement of soil physical properties,  
430 increases in soil C, and increases in soil microbial and faunal activity that also could be  
431 responsible for the increased yields responsible for the rotation effect (Ball et al., 2005; van der  
432 Putten et al., 2016). Our study provided evidence that crop rotations alter soil bacterial  
433 community composition, but the mechanisms through which this occurs can include chemical,  
434 physical, and biological changes to the soil environment. Crops can influence soil properties in a  
435 variety of ways, including chemically and physically. Chemically, plants provide carbon to the  
436 soil environment through root exudation of recently assimilated photosynthate, composed of

437 soluble, low molecular weight organic compounds (Neumann and Romheld, 2007). As a  
438 consequence, the increased C flow from root exudates can stimulate soil microbial activity.  
439 Changes in plant inputs through variation in either root exudation rates or chemical composition  
440 are likely a major factor to how crops and crop rotations, can alter belowground microbial  
441 communities. Our study focused on soil bacterial community composition. It has been identified  
442 that crop rotation also influences soil fungal and faunal communities, which are also important  
443 members of the soil food web (McLaughlin and Mineau, 1995). Changes in root exudates have  
444 been observed to shift microbial community composition and stimulate a diverse microbial  
445 community (Hooper et al., 2000; Stephan et al., 2000; Paterson et al., 2009; Dijkstra et al., 2010).  
446 Physically, crop diversity (especially rotations) can enhance soil properties like improving plant  
447 water availability by lowering bulk density, increasing soil pore space, and increasing soil  
448 aggregate formation (Tilman et al., 2002; McDaniel et al., 2014b; Tiemann et al., 2015), which  
449 could have indirect influence over the soil bacterial community as well. Biologically, soil  
450 microorganisms can provide disease suppression against plant pathogens through competition for  
451 nutrients, antibiosis, and induction of system resistance of host plants (Doornbos et al., 2012).

452         Cover crops are the most salient feature of these crop rotations affecting the soil bacterial  
453 community in general. This is not surprising, since cover crops have been shown to influence  
454 several soil properties, which likely have indirect effects on the soil bacterial community  
455 composition. Soil properties like total C, total N, pH, and bulk density and porosity have all been  
456 shown to increase with cover crops (Bullock, 1992; Liebman and Dyck, 1993; Tilman et al.,  
457 2002; McDaniel et al., 2014a; McDaniel et al., 2014b; Tiemann et al., 2015). In our study, higher  
458 crop diversity but lower soil bacterial diversity supported higher disease-suppression functional  
459 potential in soils. We posit that rotation has a filtering effect on soil microorganisms, whereby

460 crop diversity selects for antagonistic microorganisms with disease suppressive potential. Our  
461 study further supports the hypothesis that plant diversity can support biocontrol functional  
462 potential by enhancing antagonistic properties of resident soil microorganisms against soil-borne  
463 pathogens. The soil microbial community composition may be more important than soil  
464 microbial diversity to soil ecological function. Increasing evidence supports that crop species and  
465 soil type have been shown to shape the soil microbial composition and function (McDaniel et al.,  
466 2014b; Tiemann et al., 2015; Venter et al., 2016); thus, land management can have a large effect  
467 on soil microbial processes and microbial community composition (Jangid et al., 2008; Lauber et  
468 al., 2008; Orr et al., 2015).

469

#### 470 **Acknowledgements**

471 This work was supported by the U.S. Department of Agriculture National Institute of Food and  
472 Agriculture Postdoctoral Fellowship (2012-67012-19845 to A.L.P.) and the National Science  
473 Foundation (DEB 1442246 to J.T.L.). The funders had no role in study design, data collection  
474 and interpretation, preparation of the manuscript, or decision to submit the work for publication.  
475 Support was also provided by the NSF Long-term Ecological Research Program (DEB 1027253)  
476 at the Kellogg Biological Station and by Michigan State University AgBioResearch. We would  
477 like to thank the Kellogg Biological Station LTER for logistical support and use of sampling  
478 sites. We also thank M. Muscarella, J. Ford, S. Krahnke, and M. Brewer for microbial analyses  
479 support and B. O'Neill, A.S. Grandy and T.M. Schmidt Labs for field and soil analyses support.  
480 All sequence data and metadata have been submitted to NCBI and are available at XXXX.

481

482

## 483 References

- 484 Alvey, S., Bagayoko, M., Neumann, G., Buerkert, A., 2001. Cereal/legume rotations affect  
485 chemical properties and biological activities in two West African soils. *Plant Soil* 231,  
486 45-54.
- 487 Badri, D.V., Quintana, N., El Kassis, E.G., Kim, H.K., Choi, Y.H., Sugiyama, A., Verpoorte, R.,  
488 Martinoia, E., Manter, D.K., Vivanco, J.M., 2009. An ABC transporter mutation alters  
489 root exudation of phytochemicals that provoke an overhaul of natural soil microbiota.  
490 *Plant Physiol.* 151, 2006-2017.
- 491 Bakker, M.G., Glover, J.D., Mai, J.G., Kinkel, L.L., 2010. Plant community effects on the  
492 diversity and pathogen suppressive activity of soil streptomycetes. *Appl. Soil Ecol.* 46,  
493 35-42.
- 494 Ball, B., Bingham, I., Rees, R., Watson, C., Litterick, A., 2005. The role of crop rotations in  
495 determining soil structure and crop growth conditions. *Can. J. Soil Sci.* 85, 557-577.
- 496 Barness, E., Chen, Y., Hadar, Y., Marschner, H., Romheld, V., 1991. Siderophores of  
497 *Pseudomonas putida* as an iron source for dicot and monocot plants. *Plant Soil* 130, 231-  
498 241.
- 499 Berendsen, R.L., Pieterse, C.M., Bakker, P.A., 2012. The rhizosphere microbiome and plant  
500 health. *Trends Plant Sci.* 17, 478-486.
- 501 Bever, J.D., Westover, K.M., Antonovics, J., 1997. Incorporating the soil community into plant  
502 population dynamics: the utility of the feedback approach. *J. Ecol.* 85, 561-573.
- 503 Brussaard, L., De Ruiter, P.C., Brown, G.G., 2007. Soil biodiversity for agricultural  
504 sustainability. *Agric. Ecosyst. Environ.* 121, 233-244.
- 505 Bullock, D.G., 1992. Crop rotation. *Crit. Rev. Plant Sci.* 11, 309-326.
- 506 Caporaso, J.G., Lauber, C.L., Walters, W.A., Berg-Lyons, D., Huntley, J., Fierer, N., Owens,  
507 S.M., Betley, J., Fraser, L., Bauer, M., Gormley, N., Gilbert, J.A., Smith, G., Knight, R.,  
508 2012. Ultra-high-throughput microbial community analysis on the Illumina HiSeq and  
509 MiSeq platforms. *ISME J.* 6, 1621-1624.
- 510 Chaparro, J.M., Sheflin, A.M., Manter, D.K., Vivanco, J.M., 2012. Manipulating the soil  
511 microbiome to increase soil health and plant fertility. *Biol. Fertility Soils* 48, 489-499.
- 512 Clarke, K.R., 1993. Non - parametric multivariate analyses of changes in community structure.  
513 *Aust. J. Ecol.* 18, 117-143.
- 514 Crum, J.R., Collins, H.P., 1995. KBS Soils [Online], W. K. Kellogg Biological Station Long-  
515 Term Ecological Research Project, Michigan State University, Hickory Corners, MI.
- 516 Dijkstra, F.A., Morgan, J.A., Blumenthal, D., Follett, R.F., 2010. Water limitation and plant  
517 inter-specific competition reduce rhizosphere-induced C decomposition and plant N  
518 uptake. *Soil Biol. Biochem.* 42, 1073-1082.
- 519 Doornbos, R.F., van Loon, L.C., Bakker, P.A., 2012. Impact of root exudates and plant defense  
520 signaling on bacterial communities in the rhizosphere. A review. *Agron. Sustainable Dev.*  
521 32, 227-243.
- 522 Edgar, R.C., Haas, B.J., Clemente, J.C., Quince, C., Knight, R., 2011. UCHIME improves  
523 sensitivity and speed of chimera detection. *Bioinformatics* 27, 2194-2200.
- 524 Garbeva, P., Postma, J., Van Veen, J., Van Elsas, J., 2006. Effect of above - ground plant species  
525 on soil microbial community structure and its impact on suppression of *Rhizoctonia*  
526 *solani* AG3. *Environ. Microbiol.* 8, 233-246.

- 527 Garbeva, P., van Veen, J.A., van Elsas, J.D., 2004a. Microbial diversity in soil: Selection of  
528 microbial populations by plant and soil type and implications for disease suppressiveness.  
529 *Annu. Rev. Phytopathol.* 42, 243-270.
- 530 Garbeva, P., Voesenek, K., van Elsas, J.D., 2004b. Quantitative detection and diversity of the  
531 pyrrolnitrin biosynthetic locus in soil under different treatments. *Soil Biol. Biochem.* 36,  
532 1453-1463.
- 533 Haas, D., Defago, G., 2005. Biological control of soil-borne pathogens by fluorescent  
534 pseudomonads. *Nature Rev. Microbiol.* 3, 307-319.
- 535 Hättenschwiler, S., Tiunov, A.V., Scheu, S., 2005. Biodiversity and litter decomposition in  
536 terrestrial ecosystems. *Annu. Rev. Ecol. Evol. Syst.*, 191-218.
- 537 Hooper, D.U., Bignell, D.E., Brown, V.K., Brussaard, L., Dangerfield, J.M., Wall, D.H., Wardle,  
538 D.A., Coleman, D.C., Giller, K.E., Lavelle, P., Van der Putten, W.H., De Ruiter, P.C.,  
539 Rusek, J., Silver, W.L., Tiedje, J.M., Wolters, V., 2000. Interactions between  
540 aboveground and belowground biodiversity in terrestrial ecosystems: Patterns,  
541 mechanisms, and feedbacks. *Bioscience* 50, 1049-1061.
- 542 Jangid, K., Williams, M.A., Franzluebbers, A.J., Sanderlin, J.S., Reeves, J.H., Jenkins, M.B.,  
543 Endale, D.M., Coleman, D.C., Whitman, W.B., 2008. Relative impacts of land-use,  
544 management intensity and fertilization upon soil microbial community structure in  
545 agricultural systems. *Soil Biol. Biochem.* 40, 2843-2853.
- 546 Karlen, D., Varvel, G., Bullock, D.G., Cruse, R., 1994. Crop rotations for the 21st century.  
547 *Advances in Agronomy* 53.
- 548 Kozich, J.J., Westcott, S.L., Baxter, N.T., Highlander, S.K., Schloss, P.D., 2013. Development of  
549 a dual-index sequencing strategy and curation pipeline for analyzing amplicon sequence  
550 data on the MiSeq Illumina sequencing platform. *Appl. Environ. Microbiol.* 79, 5112-  
551 5120.
- 552 Kulmatiski, A., Beard, K.H., 2011. Long-term plant growth legacies overwhelm short-term plant  
553 growth effects on soil microbial community structure. *Soil Biol. Biochem.* 43, 823-830.
- 554 Kulmatiski, A., Beard, K.H., Stevens, J.R., Cobbold, S.M., 2008. Plant–soil feedbacks: a meta-  
555 analytical review. *Ecol. Lett.* 11, 980–992.
- 556 Latz, E., Eisenhauer, N., Rall, B.C., Roscher, C., Scheu, S., Jousset, A., 2012. Plant diversity  
557 improves protection against soil-borne pathogens by fostering antagonistic bacterial  
558 communities. *J. Ecol.* 100, 597-604.
- 559 Lauber, C.L., Strickland, M.S., Bradford, M.A., Fierer, N., 2008. The influence of soil properties  
560 on the structure of bacterial and fungal communities across land-use types. *Soil Biol.*  
561 *Biochem.* 40, 2407-2415.
- 562 Liebman, M., Dyck, E., 1993. Crop rotation and intercropping strategies for weed management.  
563 *Ecol. Appl.* 3, 92-122.
- 564 Lugtenberg, B., Kamilova, F., 2009. Plant-growth-promoting rhizobacteria. *Annu. Rev.*  
565 *Microbiol.* 63, 541–545.
- 566 Mavrodi, O.V., Mavrodi, D.V., Parejko, J.A., Thomashow, L.S., Weller, D.M., 2012. Irrigation  
567 differentially impacts populations of indigenous antibiotic-producing *Pseudomonas* spp.  
568 in the rhizosphere of wheat. *Appl. Environ. Microbiol.* 78, 3214-3220.
- 569 McDaniel, M.D., Grandy, A.S., 2016. Soil microbial biomass and function are altered by 12  
570 years of crop rotation. *SOIL Discuss.* 2016, 1-39.

- 571 McDaniel, M.D., Grandy, A.S., Tiemann, L.K., Weintraub, M.N., 2014a. Crop rotation  
572 complexity regulates the decomposition of high and low quality residues. *Soil Biol.*  
573 *Biochem.* 78, 243-254.
- 574 McDaniel, M.D., Grandy, A.S., Tiemann, L.K., Weintraub, M.N., *In press*. Eleven years of crop  
575 diversification alters the decomposition dynamics of litter mixtures incubated with soils.  
576 *Ecosphere*.
- 577 McDaniel, M.D., Tiemann, L.K., Grandy, A.S., 2014b. Does agricultural crop diversity enhance  
578 soil microbial biomass and organic matter dynamics? a meta-analysis. *Ecol. Appl.*
- 579 McLaughlin, A., Mineau, P., 1995. The impact of agricultural practices on biodiversity. *Agric.*  
580 *Ecosyst. Environ.* 55, 201-212.
- 581 Muscarella, M., Bird, K., Larsen, M., Placella, S., Lennon, J., 2014. Phosphorus resource  
582 heterogeneity in microbial food webs. *Aquat. Microb. Ecol.* 73, 259-272.
- 583 Needleman, S.B., Wunsch, C.D., 1970. A general method applicable to the search for similarities  
584 in the amino acid sequence of two proteins. *J. Mol. Biol.* 48, 443-453.
- 585 Neumann, G., Romheld, V., 2007. The Release of Root Exudates as Affects by the Plant  
586 Physiological Status, In: Pinton, R., Varanini, Z., Nannipieri, P. (Eds.), *The Rhizosphere:*  
587 *Biochemistry and Organic Substances at the Soil-plant Interface*, 2nd ed. CRC Press, pp.  
588 23-72.
- 589 Oksanen, J., Blanchet, F.G., Kindt, R., Legendre, P., O'Hara, R.B., Simpson, G.L., Solymos, P.,  
590 Stevens, M.H.H., Wagner, H., 2010. Community Ecology Package 'vegan'.
- 591 Orr, C., Stewart, C., Leifert, C., Cooper, J., Cummings, S., 2015. Effect of crop management and  
592 sample year on abundance of soil bacterial communities in organic and conventional  
593 cropping systems. *J. Appl. Microbiol.*
- 594 Paterson, E., Midwood, A.J., Millard, P., 2009. Through the eye of the needle: a review of  
595 isotope approaches to quantify microbial processes mediating soil carbon balance. *New*  
596 *Phytol.* 184, 19-33.
- 597 Penton, C.R., Gupta, V., Tiedje, J.M., Neate, S.M., Ophel-Keller, K., Gillings, M., Harvey, P.,  
598 Pham, A., Roget, D.K., 2014. Fungal community structure in disease suppressive soils  
599 assessed by 28S LSU gene sequencing. *PloS One* 9, e93893.
- 600 Peralta, A.L., Matthews, J.W., Flanagan, D.N., Kent, A.D., 2012. Environmental factors at  
601 dissimilar spatial scales influence plant and microbial Communities in restored wetlands.  
602 *Wetlands* 32, 1125-1134.
- 603 Perez, C., Dill-Macky, R., Kinkel, L.L., 2008. Management of soil microbial communities to  
604 enhance populations of *Fusarium graminearum*-antagonists in soil. *Plant Soil* 302, 53-69.
- 605 Postma, J., Schilder, M.T., Bloem, J., van Leeuwen-Haagsma, W.K., 2008. Soil suppressiveness  
606 and functional diversity of the soilmicroflora in organic farming systems. *Soil Biol.*  
607 *Biochem.* 40, 2394-2406.
- 608 Raaijmakers, J.M., Paulitz, T.C., Steinberg, C., Alabouvette, C., Moënne-Loccoz, Y., 2009. The  
609 rhizosphere: a playground and battlefield for soilborne pathogens and beneficial  
610 microorganisms. *Plant Soil* 321, 341-361.
- 611 Reardon, C., Gollany, H., Wuest, S., 2014. Diazotroph community structure and abundance in  
612 wheat-fallow and wheat-pea crop rotations. *Soil Biol. Biochem.* 69, 406-412.
- 613 Reed, S.C., Townsend, A.R., Cleveland, C.C., Nemergut, D.R., 2010. Microbial community  
614 shifts influence patterns in tropical forest nitrogen fixation. *Oecologia* 164, 521-531.
- 615 Schloss, P.D., Westcott, S.L., Ryabin, T., Hall, J.R., Hartmann, M., Hollister, E.B., Lesniewski,  
616 R.A., Oakley, B.B., Parks, D.H., Robinson, C.J., Sahl, J.W., Stres, B., Thallinger, G.G.,



- 617 Van Horn, D.J., Weber, C.F., 2009. Introducing mothur: Open-Source, Platform-  
618 Independent, Community-Supported Software for Describing and Comparing Microbial  
619 Communities. *Appl. Environ. Microbiol.* 75, 7537-7541.
- 620 Smith, R.G., Gross, K.L., 2006. Weed community and corn yield variability in diverse  
621 management systems. *Weed Sci.* 54, 106-113.
- 622 Smith, R.G., Gross, K.L., 2007. Assembly of weed communities along a crop diversity gradient.  
623 *J. Appl. Ecol.* 44, 1046-1056.
- 624 Smucker, A., 1993. Soil environmental modifications of root dynamics and measurement. *Annu.*  
625 *Rev. Phytopathol.* 31, 191-218.
- 626 Stephan, A., Meyer, A.H., Schmid, B., 2000. Plant diversity affects culturable soil bacteria in  
627 experimental grassland communities. *J. Ecol.* 88, 988-998.
- 628 Tiemann, L.K., Grandy, A.S., Atkinson, E.E., Marin-Spiotta, E., McDaniel, M.D., 2015. Crop  
629 rotational diversity enhances belowground communities and functions in an  
630 agroecosystem. *Ecol. Lett.* 18, 761-771.
- 631 Tilman, D., Cassman, K.G., Matson, P.A., Naylor, R., Polasky, S., 2002. Agricultural  
632 sustainability and intensive production practices. *Nature* 418, 671-677.
- 633 van der Putten, W.H., Bradford, M.A., Pernilla Brinkman, E., Voorde, T.F., Veen, G., 2016.  
634 Where, when and how plant–soil feedback matters in a changing world. *Funct. Ecol.*
- 635 Venter, Z.S., Jacobs, K., Hawkins, H.-J., 2016. The impact of crop rotation on soil microbial  
636 diversity: A meta-analysis. *Pedobiologia.*
- 637 von Felten, A., Meyer, J.B., Defago, G., Maurhofer, M., 2011. Novel T-RFLP method to  
638 investigate six main groups of 2,4-diacetylphloroglucinol-producing pseudomonads in  
639 environmental samples. *J. Microbiol. Methods* 84, 379-387.
- 640 Warton, D.I., Wright, S.T., Wang, Y., 2012. Distance - based multivariate analyses confound  
641 location and dispersion effects. *Methods Ecol. Evol.* 3, 89-101.
- 642 Weller, D.M., Raaijmakers, J.M., Gardener, B.B.M., Thomashow, L.S., 2002. Microbial  
643 populations responsible for specific soil suppressiveness to plant pathogens. *Annu. Rev.*  
644 *Phytopathol.* 40, 309-+.
- 645 Wiggins, E., Kinkel, L.L., 2005. Green manures and crop sequences influence alfalfa root rot and  
646 pathogen inhibitory activity among soil-borne streptomycetes. *Plant Soil* 268, 271-283.
- 647 Yilmaz, P., Parfrey, L.W., Yarza, P., Gerken, J., Pruesse, E., Quast, C., Schweer, T., Peplies, J.,  
648 Ludwig, W., Glöckner, F.O., 2013. The SILVA and “All-species living tree project  
649 (LTP)” taxonomic frameworks. *Nucleic Acids Res.* 42, D643-D648.
- 650 Yin, C., Jones, K.L., Peterson, D.E., Garrett, K.A., Hulbert, S.H., Paulitz, T.C., 2010. Members  
651 of soil bacterial communities sensitive to tillage and crop rotation. *Soil Biol. Biochem.*  
652 42, 2111-2118.
- 653 Zak, D.R., Holmes, W.E., White, D.C., Peacock, A.D., Tilman, D., 2003. Plant diversity, soil  
654 microbial communities, and ecosystem function: are there any links? *Ecology* 84, 2042-  
655 2050.
- 656

657

658

659

660 FIGURES

661 Figure 1

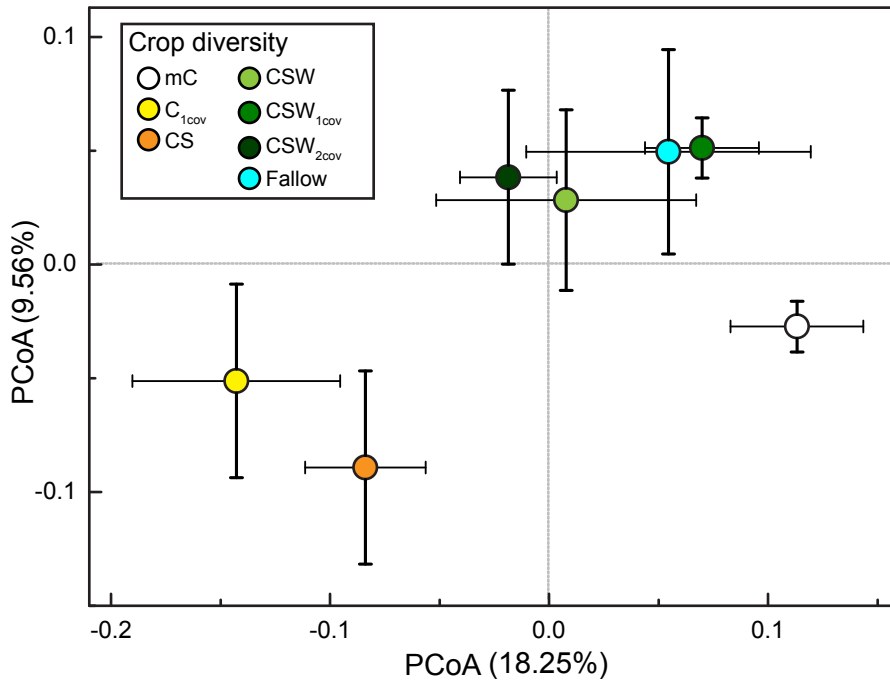

662

663 Figure 1. Ordination from Principal Coordinates Analysis depicting soil bacterial communities

664 along a cropping diversity gradient. Symbols are colored according to cropping diversity

665 treatment (mC=monoculture corn; C<sub>1cov</sub>=corn/1 cover crop; CS=corn/soy;

666 CSW=corn/soy/wheat; CSW<sub>1cov</sub>=corn/soy/wheat/1 cover crop; CSW<sub>2cov</sub>=corn/soy/wheat/2 cover

667 crops; fallow=spring fallow, tilled annually).

668

669

670

671

672

673

674 Figure 2

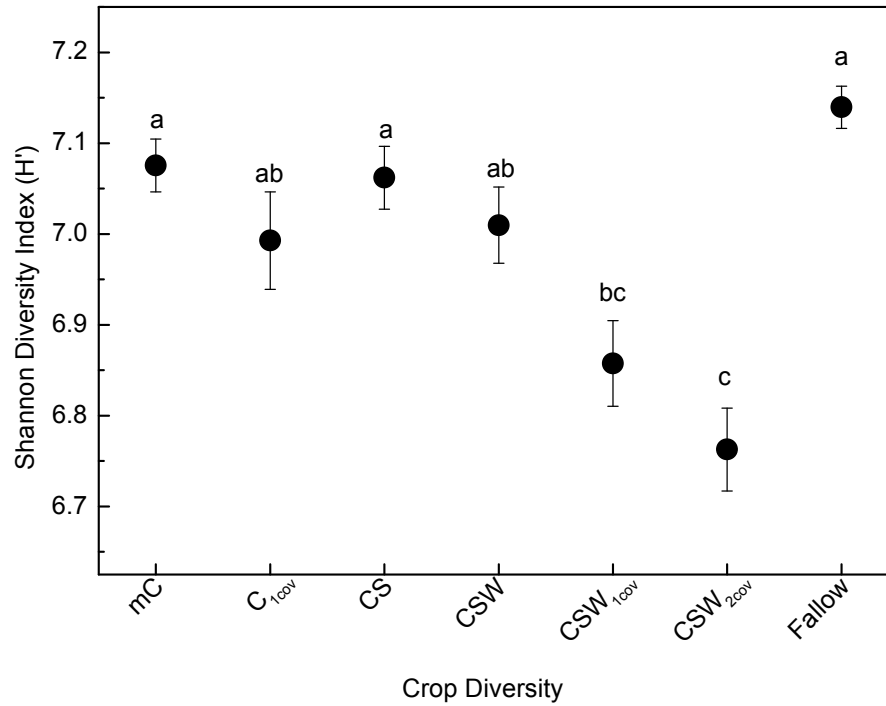

675

676 Figure 2. Total bacterial diversity (mean  $\pm$  SEM based on Shannon Diversity Index  $H'$ ) in  
677 response to long-term crop diversity treatment. Different letters above points reflect significant  
678 differences in gene abundance along crop diversity gradient at  $p < 0.05$  (Tukey's HSD *post-hoc*  
679 analysis).

680

681

682

683

684

685

686

687

688 Figure 3

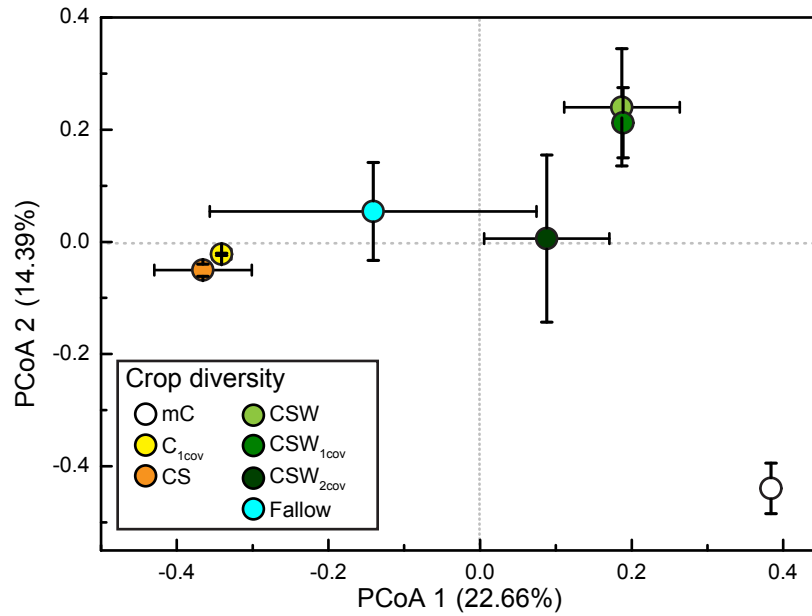

689

690 Figure 3. Ordination from Principal Coordinates Analysis of disease suppressive community

691 based on T-RFLP of *phlD* gene (DAPG producers) T-RF relative abundance along crop diversity

692 gradient.

693

694

695

696

697

698

699

700

701

702

703 Figure 4

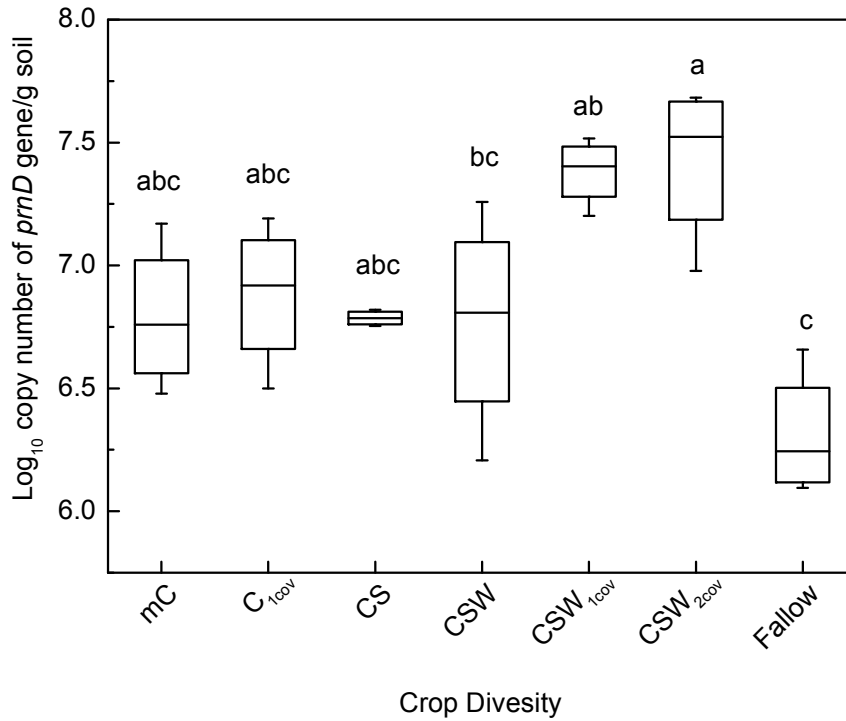

704

705 Figure 4. Abundance of *prnD* gene (PRN producers) in response to crop diversity treatment  
706 analyzed using quantitative PCR and expressed as log copy number of *prnD* gene. Different  
707 letters above points reflect significant differences in Different letters above boxplots considered  
708 significantly different in gene abundance at  $p < 0.05$  (Tukey's HSD *post-hoc* analysis).

709

710

711

712

713

714

715

716

717 **TABLES**

718

719 Table 1. Cropping diversity treatments at the Kellogg Biological Station Long-term Ecological  
720 Research (KBS LTER) Biodiversity Gradient Experiment Plots. Plant treatments were  
721 established in 2000. Treatments were composed of monoculture, two-crop rotation, three-crop  
722 rotation +/- cover crops, and fallow plots (early successional) and soil collected during the corn  
723 phase of the rotation. Treatment abbreviations are in parentheses.

724

| <b>Crop diversity treatment description</b>               | <b>Number of crop species</b> |
|-----------------------------------------------------------|-------------------------------|
| (1) Continuous monoculture (mC)                           | 1                             |
| (2) Continuous monoculture, one cover crop ( $C_{1cov}$ ) | 2                             |
| (3) Two-crop rotation (CS)                                | 2                             |
| (4) Three-crop rotation (CSW)                             | 3                             |
| (5) Three-crop rotation, one cover crop ( $CSW_{1cov}$ )  | 4                             |
| (6) Three-crop rotation, two cover crops ( $CSW_{2cov}$ ) | 5                             |
| (7) Spring Fallow/early successional field (fallow)       | 10                            |

725

726

727

728

729

730

731

732 Table 2. Summary of the contribution of (A) soil factors (original data from McDaniel et al.  
733 2014) and (B) soil biological activity (original data from McDaniel et al. XXX) on bacterial  
734 community variation at the KBS Biodiversity Gradient Experimental Plots based on  
735 permutational MANOVA (PERMANOVA). Soil factor effects were considered to significantly  
736 contribute to community variation at  $P < 0.05$ .

737

738 (a) Soil Factors

| Effect    | df | SS    | MS    | <i>F</i> | <i>R</i> <sup>2</sup> | <i>p</i> -value |
|-----------|----|-------|-------|----------|-----------------------|-----------------|
| Sand      | 1  | 0.088 | 0.088 | 2.243    | 0.066                 | 0.014           |
| Silt      | 1  | 0.088 | 0.088 | 2.239    | 0.066                 | 0.020           |
| Clay      | 1  | 0.087 | 0.087 | 2.207    | 0.065                 | 0.024           |
| pH        | 1  | 0.057 | 0.057 | 1.444    | 0.043                 | 0.143           |
| Nitrate   | 1  | 0.023 | 0.023 | 0.593    | 0.018                 | 0.893           |
| Ammonium  | 1  | 0.019 | 0.019 | 0.496    | 0.015                 | 0.966           |
| Nitrogen  | 1  | 0.043 | 0.043 | 1.086    | 0.032                 | 0.326           |
| Carbon    | 1  | 0.036 | 0.036 | 0.921    | 0.027                 | 0.491           |
| Moisture  | 1  | 0.064 | 0.064 | 1.622    | 0.048                 | 0.078           |
| Residuals | 18 | 0.707 | 0.039 |          | 0.534                 |                 |
| Total     | 27 | 1.325 |       |          | 1                     |                 |

739

740

741

742

743

744 (b) Soil Biological Activity

| Effect    | df | SS    | MS    | <i>F</i> | <i>R</i> <sup>2</sup> | <i>p</i> -value |
|-----------|----|-------|-------|----------|-----------------------|-----------------|
| PMN       | 1  | 0.083 | 0.083 | 1.821    | 0.063                 | 0.049           |
| PMC       | 1  | 0.062 | 0.062 | 1.358    | 0.047                 | 0.146           |
| POXC      | 1  | 0.097 | 0.097 | 2.125    | 0.074                 | 0.028           |
| Residuals | 24 | 1.100 | 0.046 |          | 0.830                 |                 |
| Total     | 27 | 1.325 |       |          | 1                     |                 |

745

746

747

748

749

750

751

752

753

754

755

756

757

758

759



760 Table 3. Summary of multiple linear regression to test the influence of disease suppressive  
761 functional potential (*prnD* gene abundance) on soil factors and crop diversity.

762

| Factor      | Estimate | Std error | t-value | <i>p</i> -value |
|-------------|----------|-----------|---------|-----------------|
| Intercept   | 7.444    | 0.420     | 17.728  | < 0.001         |
| Crop_number | -0.085   | 0.025     | -3.355  | 0.003           |
| Carbon      | 0.180    | 0.050     | 3.618   | 0.002           |
| Moisture    | -11.564  | 2.817     | -4.105  | < 0.001         |
| Ammonium    | -0.701   | 0.948     | -0.739  | 0.468           |
| Nitrate     | 0.093    | 0.136     | 0.684   | 0.501           |

763

764

765

766

767

768

769

770

771

772

773

774

775

1 Table S1 Soil properties measured along the KBS cropping diversity gradient averaged over four replicate blocks. We acknowledge  
 2 M.D. McDaniel and A.S. Grandy for these results (\*McDaniel et al. 2014).

3

| Treatment | Total C<br>(g C kg <sup>-1</sup> soil) | Total N<br>(g N kg <sup>-1</sup> soil) | NH <sub>4</sub> <sup>+</sup><br>(mg N kg <sup>-1</sup> soil) | NO <sub>3</sub> <sup>-</sup><br>(mg N kg <sup>-1</sup> soil) | pH          | Clay<br>(%) | Silt<br>(%) | Sand<br>(%) |
|-----------|----------------------------------------|----------------------------------------|--------------------------------------------------------------|--------------------------------------------------------------|-------------|-------------|-------------|-------------|
| Fallow    | 8.74 ± 2.41                            | 0.77 ± 0.16                            | 0.07 ± 0.04                                                  | 1.50 ± 0.31                                                  | 6.70 ± 0.28 | 25 ± 9      | 39 ± 19     | 36 ± 11     |
| CSW-2cov  | 8.98 ± 1.81                            | 0.91 ± 0.12                            | 0.09 ± 0.04                                                  | 1.24 ± 0.50                                                  | 6.25 ± 0.11 | 21 ± 10     | 51 ± 22     | 29 ± 12     |
| CSW-1cov  | 9.63 ± 1.29                            | 0.91 ± 0.04                            | 0.06 ± 0.02                                                  | 1.09 ± 0.51                                                  | 6.37 ± 0.25 | 24 ± 10     | 46 ± 17     | 31 ± 7      |
| CSW       | 7.43 ± 1.58                            | 0.70 ± 0.10                            | 0.07 ± 0.03                                                  | 1.26 ± 0.62                                                  | 6.54 ± 0.21 | 21 ± 10     | 45 ± 21     | 34 ± 12     |
| CS        | 7.70 ± 2.11                            | 0.73 ± 0.26                            | 0.10 ± 0.09                                                  | 1.16 ± 0.74                                                  | 6.66 ± 0.12 | 23 ± 11     | 41 ± 24     | 36 ± 14     |
| C-1cov    | 9.09 ± 1.86                            | 0.93 ± 0.16                            | 0.06 ± 0.02                                                  | 1.50 ± 0.65                                                  | 6.46 ± 0.25 | 27 ± 8      | 36 ± 19     | 38 ± 12     |
| C         | 8.09 ± 1.24                            | 0.71 ± 0.15                            | 0.16 ± 0.16                                                  | 1.31 ± 0.36                                                  | 6.58 ± 0.38 | 25 ± 9      | 36 ± 19     | 38 ± 11     |

4

5 \*McDaniel MD, Grandy AS, Tiemann LK, Weintraub MN. 2014. Crop rotation complexity regulates the decomposition of high and  
 6 low quality residues. Soil Biol Biochem 78:243-254.

Table S2 Effects of crop rotation on total bacterial community composition based on 16S rRNA amplicon sequencing (a) and disease suppressive community composition based on *phlD* gene T-RFLP (b) at the KBS Biodiversity Gradient Experimental Plots based on permutational MANOVA (PERMANOVA) results. Rotation effect was considered to significantly contribute to community variation at  $P < 0.05$ .

(a) 16S rRNA gene

|           | df | SS    | MS    | <i>F</i> | $R^2$ | <i>p</i> -value |
|-----------|----|-------|-------|----------|-------|-----------------|
| Rotation  | 6  | 0.493 | 0.082 | 2.08     | 0.372 | <0.001          |
| Residuals | 21 | 0.832 | 0.040 |          | 0.628 |                 |
| Total     | 27 | 1.32  |       |          | 1     |                 |

(b) *phlD* gene T-RFLP

|           | df | SS    | MS    | <i>F</i> | $R^2$ | <i>p</i> -value |
|-----------|----|-------|-------|----------|-------|-----------------|
| Rotation  | 8  | 3.024 | 0.378 | 1.748    | 0.518 | 0.037           |
| Residuals | 13 | 2.811 | 0.216 |          | 0.482 |                 |
| Total     | 21 | 5.835 |       |          | 1.000 |                 |

Table S3 Summary of similarity percentages (SIMPER) of the top 10 bacterial taxa responsible for differences in bacterial community composition between monoculture corn and each of the crop diversity/fallow treatments.

CS-C

| OTU ID    | average | sd     | ratio  | ava    | avb    | cusum  | taxonomy                                                                                                                                              |
|-----------|---------|--------|--------|--------|--------|--------|-------------------------------------------------------------------------------------------------------------------------------------------------------|
| Otu000001 | 0.0031  | 0.0019 | 1.6782 | 0.0291 | 0.0267 | 0.0117 | Bacteria;Proteobacteria;Alphaproteobacteria;Sphingomonadales;Sphingomonadaceae;unclassified                                                           |
| Otu000002 | 0.0028  | 0.0016 | 1.7098 | 0.0361 | 0.0305 | 0.0221 | Bacteria;Acidobacteria;Acidobacteria_Gp6;Acidobacteria_Gp6_order_incertae_sedis;Acidobacteria_Gp6_family_incertae_sedis;Gp6                           |
| Otu000004 | 0.0024  | 0.0010 | 2.4510 | 0.0190 | 0.0183 | 0.0312 | Bacteria;Acidobacteria;Acidobacteria_Gp6;Acidobacteria_Gp6_order_incertae_sedis;Acidobacteria_Gp6_family_incertae_sedis;Gp6                           |
| Otu000003 | 0.0023  | 0.0019 | 1.2195 | 0.0192 | 0.0174 | 0.0398 | Bacteria;Acidobacteria;Acidobacteria_Gp4;Acidobacteria_Gp4_order_incertae_sedis;Acidobacteria_Gp4_family_incertae_sedis;Gp4                           |
| Otu000005 | 0.0016  | 0.0011 | 1.4928 | 0.0126 | 0.0126 | 0.0457 | Bacteria;Acidobacteria;Acidobacteria_Gp6;Acidobacteria_Gp6_order_incertae_sedis;Acidobacteria_Gp6_family_incertae_sedis;Gp6                           |
| Otu000028 | 0.0012  | 0.0004 | 3.4057 | 0.0051 | 0.0051 | 0.0504 | Bacteria;unclassified;unclassified;unclassified;unclassified;unclassified                                                                             |
| Otu000064 | 0.0012  | 0.0013 | 0.9627 | 0.0017 | 0.0030 | 0.0550 | Bacteria;Firmicutes;Bacilli;Bacillales;unclassified;unclassified                                                                                      |
| Otu000017 | 0.0011  | 0.0010 | 1.1353 | 0.0052 | 0.0061 | 0.0593 | Bacteria;Verrucomicrobia;Spartobacteria;Spartobacteria_order_incertae_sedis;Spartobacteria_family_incertae_sedis;Spartobacteria_genera_incertae_sedis |
| Otu000007 | 0.0011  | 0.0009 | 1.2244 | 0.0063 | 0.0081 | 0.0635 | Bacteria;Proteobacteria;Alphaproteobacteria;Rhizobiales;Bradyrhizobiales;unclassified                                                                 |
| Otu000006 | 0.0011  | 0.0008 | 1.4008 | 0.0067 | 0.0076 | 0.0675 | Bacteria;Verrucomicrobia;Spartobacteria;Spartobacteria_order_incertae_sedis;Spartobacteria_family_incertae_sedis;Spartobacteria_genera_incertae_sedis |

## C-C1cov

| OTU ID    | average | sd     | ratio  | ava    | avb    | cusum  | taxonomy                                                                                                                    |
|-----------|---------|--------|--------|--------|--------|--------|-----------------------------------------------------------------------------------------------------------------------------|
| Otu000001 | 0.0051  | 0.0033 | 1.5290 | 0.0267 | 0.0358 | 0.0178 | Bacteria;Proteobacteria;Alphaproteobacteria;Sphingomonadales;Sphingomonadaceae;unclassified                                 |
| Otu000002 | 0.0027  | 0.0015 | 1.7418 | 0.0305 | 0.0292 | 0.0271 | Bacteria;Acidobacteria;Acidobacteria_Gp6;Acidobacteria_Gp6_order_incertae_sedis;Acidobacteria_Gp6_family_incertae_sedis;Gp6 |
| Otu000004 | 0.0025  | 0.0013 | 1.8750 | 0.0183 | 0.0178 | 0.0358 | Bacteria;Acidobacteria;Acidobacteria_Gp6;Acidobacteria_Gp6_order_incertae_sedis;Acidobacteria_Gp6_family_incertae_sedis;Gp6 |
| Otu000008 | 0.0020  | 0.0013 | 1.4620 | 0.0032 | 0.0071 | 0.0427 | Bacteria;Actinobacteria;Actinobacteria;Actinomycetales;Micrococccaceae;unclassified                                         |
| Otu000005 | 0.0016  | 0.0010 | 1.5955 | 0.0126 | 0.0104 | 0.0484 | Bacteria;Acidobacteria;Acidobacteria_Gp6;Acidobacteria_Gp6_order_incertae_sedis;Acidobacteria_Gp6_family_incertae_sedis;Gp6 |
| Otu000009 | 0.0015  | 0.0011 | 1.3491 | 0.0054 | 0.0080 | 0.0535 | Bacteria;Proteobacteria;Betaproteobacteria;Burkholderiales;Oxalobacteraceae;unclassified                                    |
| Otu000003 | 0.0014  | 0.0010 | 1.3998 | 0.0174 | 0.0169 | 0.0585 | Bacteria;Acidobacteria;Acidobacteria_Gp4;Acidobacteria_Gp4_order_incertae_sedis;Acidobacteria_Gp4_family_incertae_sedis;Gp4 |
| Otu000011 | 0.0014  | 0.0008 | 1.7199 | 0.0061 | 0.0089 | 0.0634 | Bacteria;Proteobacteria;Betaproteobacteria;Burkholderiales;Comamonadaceae(97);unclassified(93)                              |
| Otu000028 | 0.0013  | 0.0009 | 1.4952 | 0.0051 | 0.0036 | 0.0681 | Bacteria;unclassified;unclassified;unclassified;unclassified;unclassified;                                                  |
| Otu000049 | 0.0013  | 0.0012 | 1.0088 | 0.0027 | 0.0047 | 0.0725 | Bacteria;Acidobacteria;Acidobacteria_Gp7;Acidobacteria_Gp7_order_incertae_sedis;Acidobacteria_Gp7_family_incertae_sedis;Gp7 |

CSW -C

| OTU ID    | average | sd     | ratio  | ava    | avb    | cusum  | taxonomy                                                                                                                                              |
|-----------|---------|--------|--------|--------|--------|--------|-------------------------------------------------------------------------------------------------------------------------------------------------------|
| Otu000001 | 0.0037  | 0.0025 | 1.4701 | 0.0256 | 0.0267 | 0.0127 | Bacteria;Proteobacteria;Alphaproteobacteria;Sphingomonadales;Sphingomonadaceae;unclassified                                                           |
| Otu000003 | 0.0034  | 0.0026 | 1.3177 | 0.0238 | 0.0174 | 0.0242 | Bacteria;Acidobacteria;Acidobacteria_Gp4;Acidobacteria_Gp4_order_incertae_sedis;Acidobacteria_Gp4_family_incertae_sedis;Gp4                           |
| Otu000004 | 0.0031  | 0.0024 | 1.3097 | 0.0194 | 0.0183 | 0.0349 | Bacteria;Acidobacteria;Acidobacteria_Gp6;Acidobacteria_Gp6_order_incertae_sedis;Acidobacteria_Gp6_family_incertae_sedis;Gp6                           |
| Otu000005 | 0.0025  | 0.0016 | 1.5315 | 0.0119 | 0.0126 | 0.0433 | Bacteria;Acidobacteria;Acidobacteria_Gp6;Acidobacteria_Gp6_order_incertae_sedis;Acidobacteria_Gp6_family_incertae_sedis;Gp6                           |
| Otu000002 | 0.0024  | 0.0018 | 1.3352 | 0.0302 | 0.0305 | 0.0513 | Bacteria;Acidobacteria;Acidobacteria_Gp6;Acidobacteria_Gp6_order_incertae_sedis;Acidobacteria_Gp6_family_incertae_sedis;Gp6                           |
| Otu000006 | 0.0019  | 0.0016 | 1.2433 | 0.0111 | 0.0076 | 0.0579 | Bacteria;Verrucomicrobia;Spartobacteria;Spartobacteria_order_incertae_sedis;Spartobacteria_family_incertae_sedis;Spartobacteria_genera_incertae_sedis |
| Otu000064 | 0.0018  | 0.0020 | 0.9285 | 0.0037 | 0.0030 | 0.0642 | Bacteria;Firmicutes;Bacilli;Bacillales;unclassified;unclassified                                                                                      |
| Otu000025 | 0.0013  | 0.0015 | 0.8854 | 0.0057 | 0.0040 | 0.0687 | Bacteria;Bacteroidetes;Sphingobacteria;Sphingobacteriales;Chitinophagaceae;Flavisolibacter                                                            |
| Otu000016 | 0.0013  | 0.0008 | 1.6594 | 0.0069 | 0.0069 | 0.0732 | Bacteria;Acidobacteria;Acidobacteria_Gp4;Acidobacteria_Gp4_order_incertae_sedis;Acidobacteria_Gp4_family_incertae_sedis;Gp4                           |
| Otu000028 | 0.0013  | 0.0008 | 1.6126 | 0.0042 | 0.0051 | 0.0777 | Bacteria;unclassified;unclassified;unclassified;unclassified;unclassified                                                                             |

CSW1cov-  
C

| OTU ID    | average | sd     | ratio  | ava    | avb    | cusum  | taxonomy                                                                                                                                              |
|-----------|---------|--------|--------|--------|--------|--------|-------------------------------------------------------------------------------------------------------------------------------------------------------|
| Otu000001 | 0.0080  | 0.0029 | 2.7324 | 0.0427 | 0.0267 | 0.0233 | Bacteria;Proteobacteria;Alphaproteobacteria;Sphingomonadales;Sphingomonadaceae;unclassified                                                           |
| Otu000002 | 0.0053  | 0.0017 | 3.2004 | 0.0198 | 0.0305 | 0.0388 | Bacteria;Acidobacteria;Acidobacteria_Gp6;Acidobacteria_Gp6_order_incertae_sedis;Acidobacteria_Gp6_family_incertae_sedis;Gp6                           |
| Otu000008 | 0.0037  | 0.0026 | 1.4427 | 0.0107 | 0.0032 | 0.0497 | Bacteria;Actinobacteria;Actinobacteria;Actinomycetales;Micrococccaceae;unclassified                                                                   |
| Otu000004 | 0.0029  | 0.0020 | 1.4488 | 0.0143 | 0.0183 | 0.0582 | Bacteria;Acidobacteria;Acidobacteria_Gp6;Acidobacteria_Gp6_order_incertae_sedis;Acidobacteria_Gp6_family_incertae_sedis;Gp6                           |
| Otu000025 | 0.0021  | 0.0018 | 1.1963 | 0.0074 | 0.0040 | 0.0644 | Bacteria;Bacteroidetes;Sphingobacteria;Sphingobacteriales;Chitinophagaceae;Flavisolibacter                                                            |
| Otu000006 | 0.0018  | 0.0014 | 1.2519 | 0.0108 | 0.0076 | 0.0697 | Bacteria;Verrucomicrobia;Spartobacteria;Spartobacteria_order_incertae_sedis;Spartobacteria_family_incertae_sedis;Spartobacteria_genera_incertae_sedis |
| Otu000003 | 0.0018  | 0.0012 | 1.4489 | 0.0151 | 0.0174 | 0.0749 | Bacteria;Acidobacteria;Acidobacteria_Gp4;Acidobacteria_Gp4_order_incertae_sedis;Acidobacteria_Gp4_family_incertae_sedis;Gp4                           |
| Otu000005 | 0.0016  | 0.0009 | 1.7331 | 0.0115 | 0.0126 | 0.0796 | Bacteria;Acidobacteria;Acidobacteria_Gp6;Acidobacteria_Gp6_order_incertae_sedis;Acidobacteria_Gp6_family_incertae_sedis;Gp6                           |
| Otu000064 | 0.0014  | 0.0009 | 1.5663 | 0.0038 | 0.0030 | 0.0838 | Bacteria;Firmicutes;Bacilli;Bacillales;unclassified;unclassified                                                                                      |
| Otu000028 | 0.0014  | 0.0010 | 1.3996 | 0.0032 | 0.0051 | 0.0879 | Bacteria;unclassified;unclassified;unclassified;unclassified;unclassified                                                                             |

CSW2cov-  
C

| OTU ID    | average | sd     | ratio  | ava    | avb    | cumsu<br>m | Taxonomy                                                                                                                                              |
|-----------|---------|--------|--------|--------|--------|------------|-------------------------------------------------------------------------------------------------------------------------------------------------------|
| Otu000001 | 0.0135  | 0.0041 | 3.3287 | 0.0538 | 0.0267 | 0.0354     | Bacteria;Proteobacteria;Alphaproteobacteria;Sphingomonadales;Sphingomonadaceae;unclassified                                                           |
| Otu000002 | 0.0059  | 0.0022 | 2.7222 | 0.0188 | 0.0305 | 0.0507     | Bacteria;Acidobacteria;Acidobacteria_Gp6;Acidobacteria_Gp6_order_incertae_sedis;Acidobacteria_Gp6_family_incertae_sedis;Gp6                           |
| Otu000004 | 0.0036  | 0.0025 | 1.4686 | 0.0118 | 0.0183 | 0.0602     | Bacteria;Acidobacteria;Acidobacteria_Gp6;Acidobacteria_Gp6_order_incertae_sedis;Acidobacteria_Gp6_family_incertae_sedis;Gp6                           |
| Otu000008 | 0.0036  | 0.0020 | 1.7843 | 0.0104 | 0.0032 | 0.0697     | Bacteria;Actinobacteria;Actinobacteria;Actinomycetales;Micrococccaceae;unclassified                                                                   |
| Otu000003 | 0.0035  | 0.0022 | 1.6243 | 0.0168 | 0.0174 | 0.0789     | Bacteria;Acidobacteria;Acidobacteria_Gp4;Acidobacteria_Gp4_order_incertae_sedis;Acidobacteria_Gp4_family_incertae_sedis;Gp4                           |
| Otu000006 | 0.0033  | 0.0032 | 1.0351 | 0.0130 | 0.0076 | 0.0876     | Bacteria;Verrucomicrobia;Spartobacteria;Spartobacteria_order_incertae_sedis;Spartobacteria_family_incertae_sedis;Spartobacteria_genera_incertae_sedis |
| Otu000035 | 0.0026  | 0.0024 | 1.0971 | 0.0072 | 0.0031 | 0.0944     | Bacteria;Acidobacteria;Acidobacteria_Gp1;Acidobacteria_Gp1_order_incertae_sedis;Acidobacteria_Gp1_family_incertae_sedis;Gp1                           |
| Otu000021 | 0.0022  | 0.0015 | 1.4605 | 0.0086 | 0.0042 | 0.1001     | Bacteria;Proteobacteria;Alphaproteobacteria;Rhizobiales;unclassified;unclassified                                                                     |
| Otu000009 | 0.0020  | 0.0010 | 2.0627 | 0.0094 | 0.0054 | 0.1054     | Bacteria;Proteobacteria;Betaproteobacteria;Burkholderiales;Oxalobacteraceae;unclassified                                                              |
| Otu000027 | 0.0020  | 0.0014 | 1.4213 | 0.0073 | 0.0039 | 0.1106     | Bacteria;Proteobacteria;Alphaproteobacteria;unclassified;unclassified;unclassified                                                                    |



## fallow-C

| OTU ID    | average | sd     | ratio  | ava    | avb    | cusum  | taxonomy                                                                                                                                              |
|-----------|---------|--------|--------|--------|--------|--------|-------------------------------------------------------------------------------------------------------------------------------------------------------|
| Otu000001 | 0.0029  | 0.0018 | 1.6218 | 0.0237 | 0.0267 | 0.0101 | Bacteria;Proteobacteria;Alphaproteobacteria;Sphingomonadales;Sphingomonadaceae;unclassified                                                           |
| Otu000004 | 0.0024  | 0.0015 | 1.5848 | 0.0197 | 0.0183 | 0.0185 | Bacteria;Acidobacteria;Acidobacteria_Gp6;Acidobacteria_Gp6_order_incertae_sedis;Acidobacteria_Gp6_family_incertae_sedis;Gp6                           |
| Otu000002 | 0.0022  | 0.0009 | 2.3624 | 0.0261 | 0.0305 | 0.0262 | Bacteria;Acidobacteria;Acidobacteria_Gp6;Acidobacteria_Gp6_order_incertae_sedis;Acidobacteria_Gp6_family_incertae_sedis;Gp6                           |
| Otu000005 | 0.0015  | 0.0009 | 1.5931 | 0.0125 | 0.0126 | 0.0314 | Bacteria;Acidobacteria;Acidobacteria_Gp6;Acidobacteria_Gp6_order_incertae_sedis;Acidobacteria_Gp6_family_incertae_sedis;Gp6                           |
| Otu000009 | 0.0015  | 0.0007 | 2.1148 | 0.0083 | 0.0054 | 0.0365 | Bacteria;Proteobacteria;Betaproteobacteria;Burkholderiales;Oxalobacteraceae;unclassified                                                              |
| Otu000028 | 0.0013  | 0.0009 | 1.4890 | 0.0034 | 0.0051 | 0.0411 | Bacteria;unclassified;unclassified;unclassified;unclassified;unclassified                                                                             |
| Otu000003 | 0.0013  | 0.0008 | 1.5674 | 0.0171 | 0.0174 | 0.0456 | Bacteria;Acidobacteria;Acidobacteria_Gp4;Acidobacteria_Gp4_order_incertae_sedis;Acidobacteria_Gp4_family_incertae_sedis;Gp4                           |
| Otu000016 | 0.0013  | 0.0007 | 1.7643 | 0.0046 | 0.0069 | 0.0500 | Bacteria;Acidobacteria;Acidobacteria_Gp4;Acidobacteria_Gp4_order_incertae_sedis;Acidobacteria_Gp4_family_incertae_sedis;Gp4                           |
| Otu000020 | 0.0013  | 0.0009 | 1.3536 | 0.0069 | 0.0044 | 0.0544 | Bacteria;Proteobacteria;Alphaproteobacteria;Sphingomonadales;Sphingomonadaceae;unclassified                                                           |
| Otu000006 | 0.0011  | 0.0008 | 1.4200 | 0.0076 | 0.0076 | 0.0584 | Bacteria;Verrucomicrobia;Spartobacteria;Spartobacteria_order_incertae_sedis;Spartobacteria_family_incertae_sedis;Spartobacteria_genera_incertae_sedis |

Table S4. Effects of crop rotation on biocontrol bacterial community (composed of *Streptomyces spp.* and *Pseudomonas spp.*) at the KBS Biodiversity Gradient Experimental

Plots based on permutational MANOVA (PERMANOVA) results. Rotation effect was considered to significantly contribute to community variation at  $P < 0.05$ .

|           | df | SS    | MS    | <i>F</i> | $R^2$ | <i>p</i> -value |
|-----------|----|-------|-------|----------|-------|-----------------|
| Rotation  | 6  | 0.768 | 0.128 | 1.654    | 0.321 | 0.132           |
| Residuals | 21 | 1.626 | 0.077 |          | 0.679 |                 |
| Total     | 27 | 2.394 |       |          | 1     |                 |
